# Supplementary material for: Steam reforming of methane by titanium oxide photocatalysts with hollow spheres
Source: Royal Society of Chemistry journal article supplement (doi:10.1039/d3se01346d), 2024-01-01
Supplement: d3se01346d1.pdf [file d3se01346d1.pdf]

## Supporting Information

### Steam Reforming of Methane by Titanium oxide Photocatalysts with Hollow Spheres

*Akira Yamaguchi\**, *Tomoki Kujirai*, *Takeshi Fujita*, *Hideki Abe*, and *Masahiro Miyauchi\**

#### Table of Contents

1. Calculation of outer quantum efficiency
2. FE-TEM image and elemental mapping of the Rh/hollow TiO<sub>2</sub>/Pt photocatalyst. (Figure S1)
3. N<sub>2</sub> adsorption-desorption isotherm of samples (Figure S2)
4. XPS spectra of Rh/hollow TiO<sub>2</sub>/Pt. (Figure S3)
5. Optical properties of hollow TiO<sub>2</sub> and Rh/hollow TiO<sub>2</sub>/Pt. (Figure S4)
6. Photocatalytic SRM activity comparison between hollow sphere-structured TiO<sub>2</sub> and non-hollow TiO<sub>2</sub> loaded with Rh as a co-catalyst. (Figure S5)
7. Product distribution generated by Pt and Rh-loaded hollow TiO<sub>2</sub> photocatalysts during SRM. (Figure S6)
8. Influence of co-catalyst loading amount of photocatalytic SRM activity on Rh/hollow TiO<sub>2</sub>/Pt. (Figure S7)
9. Temperature dependence of photocatalytic SRM activity on Rh/Hollow TiO<sub>2</sub>/Pt. (Figure S8)
10. Spectrum of the Hg-Xe lamp used for SRM test. (Figure S9)
11. Schematic image of the flow-reactor used for SRM test. (Figure S10)
12. Spectrum of the Hg-Xe lamp obtained using long-pass cutoff filters. (Figure S11)

### 1. Calculation of the outer quantum efficiency

Outer quantum efficiency for Rh/hollow TiO<sub>2</sub>/Pt was calculated by the amount of hydrogen production divided by irradiated photon numbers determined by the spectrum of the light source.

$$\begin{aligned} \text{outer quantum efficiency [\%]} &= \frac{\text{amount of consumed electrons to produce } H_2 [s^{-1}]}{\text{irradiated photon number } [s^{-1}]} = \frac{2 \cdot H [mol s^{-1}] \cdot N_A [mol^{-1}]}{\sum_{\lambda=200}^{800} \frac{E(\lambda) [\mu W \cdot cm^{-2}] \cdot A [cm^2] \cdot 10^{-6}}{h [J \cdot s] \cdot c [m \cdot s^{-1}] / \lambda [nm]}} \end{aligned}$$

$H [mol s^{-1}]$ : Hydrogen production rate

$N_A [mol^{-1}]$ : Avogadro number ( $6.02 \times 10^{23}$ )

$E(\lambda) [\mu W \cdot cm^{-2}]$ : Light energy when the wavelength is  $\lambda$  nm

$h [J \cdot s]$ : Planck constant ( $= 6.63 \times 10^{-34}$ )

$c [m \cdot s^{-1}]$ : Speed of light ( $= 3.0 \times 10^8$ )

$\lambda [nm]$ : Wavelength

$A [cm^2]$ : Light irradiated area ( $= 0.175 cm^2$ )

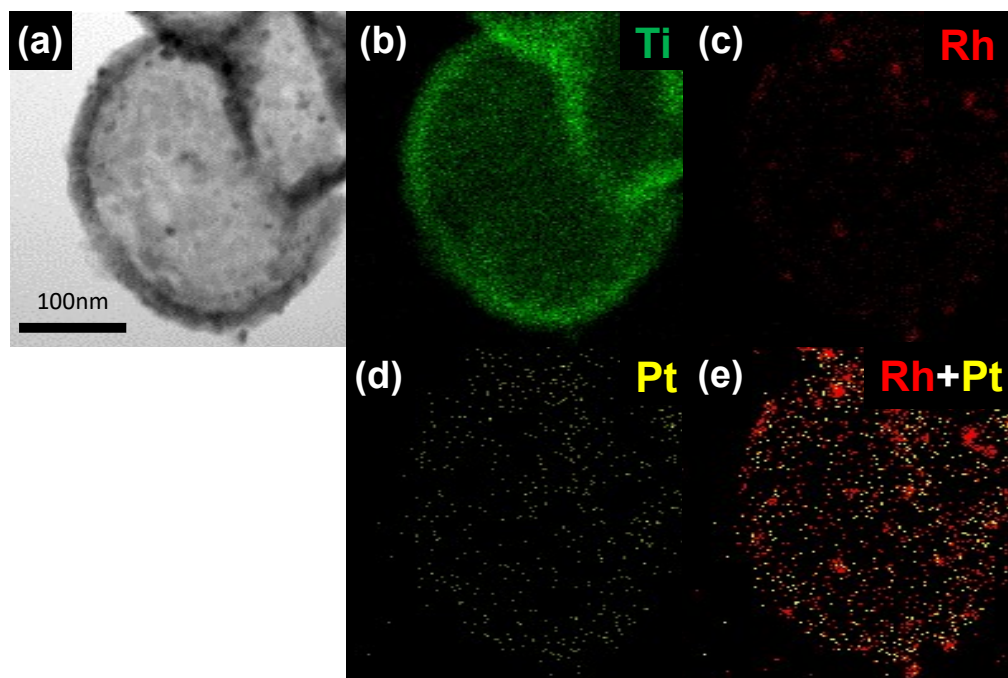

**Figure S1.** (a) FE-TEM image and (b-e) elemental mapping of the Rh/hollow TiO<sub>2</sub>/Pt photocatalyst.

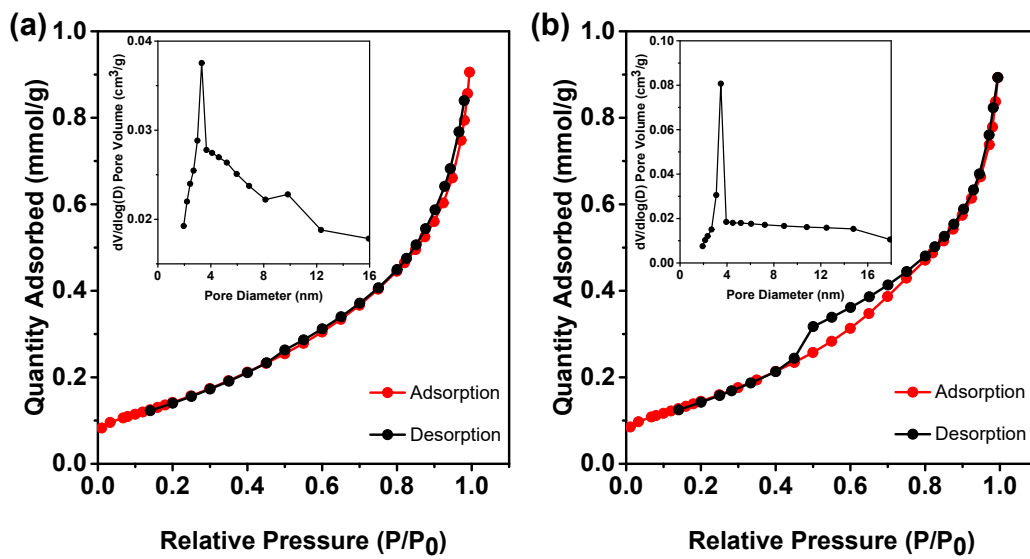

Figure S2.

$N_2$  adsorption-desorption isotherm of (a) hollow  $TiO_2$  and (b) Rh/hollow  $TiO_2/Pt$ . The inset shows the pore size distribution.

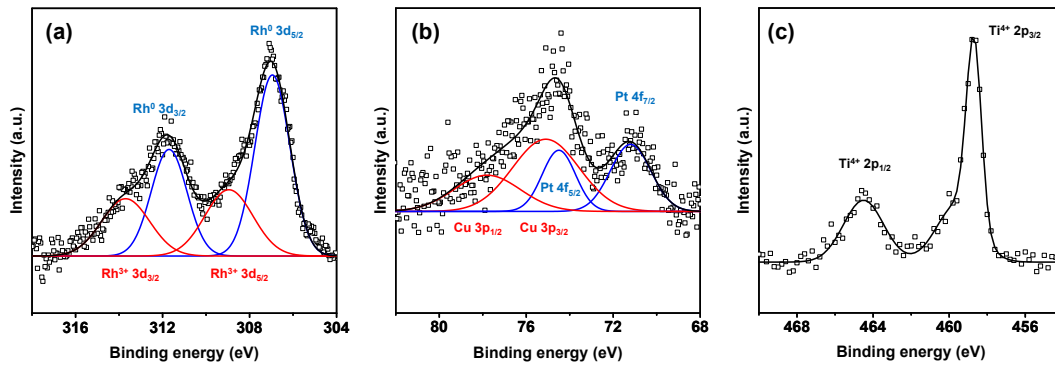

Figure S3.  
XPS

spectra of Rh/hollow TiO<sub>2</sub>/Pt for the (a) Rh 3d, (b) Pt 4f, and (c) Ti 2p regions. The Cu 3p peaks in panel (b) originated from the Cu tape used to fix the sample on the instrument holder.

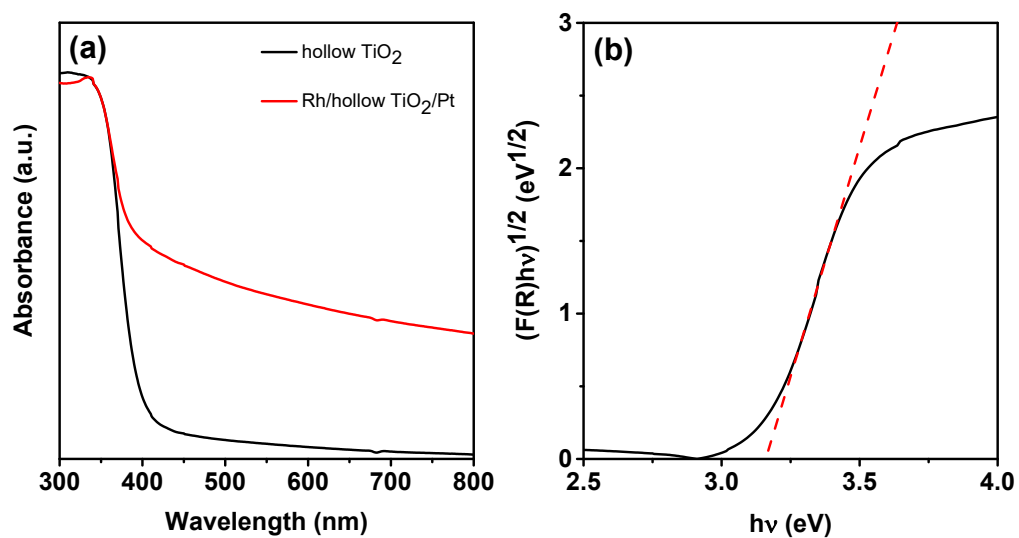

**Figur**  
**e S4.** Optical properties of hollow TiO<sub>2</sub> (black line) and Rh/hollow TiO<sub>2</sub>/Pt (red line). (a) UV-Vis spectra and (b) the corresponding Tauc-plot.

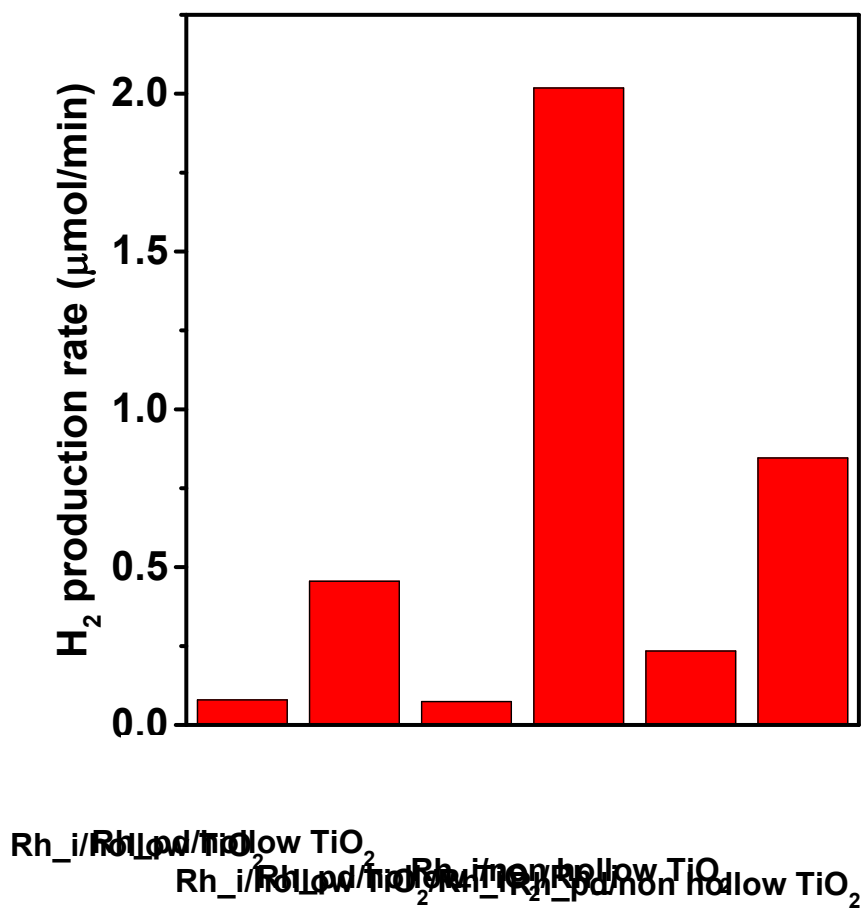

**Figure S5.** Photocatalytic SRM activity comparison between hollow sphere-structured TiO<sub>2</sub> and non-hollow TiO<sub>2</sub> loaded with Rh as a co-catalyst. The operation temperature was 300 °C.

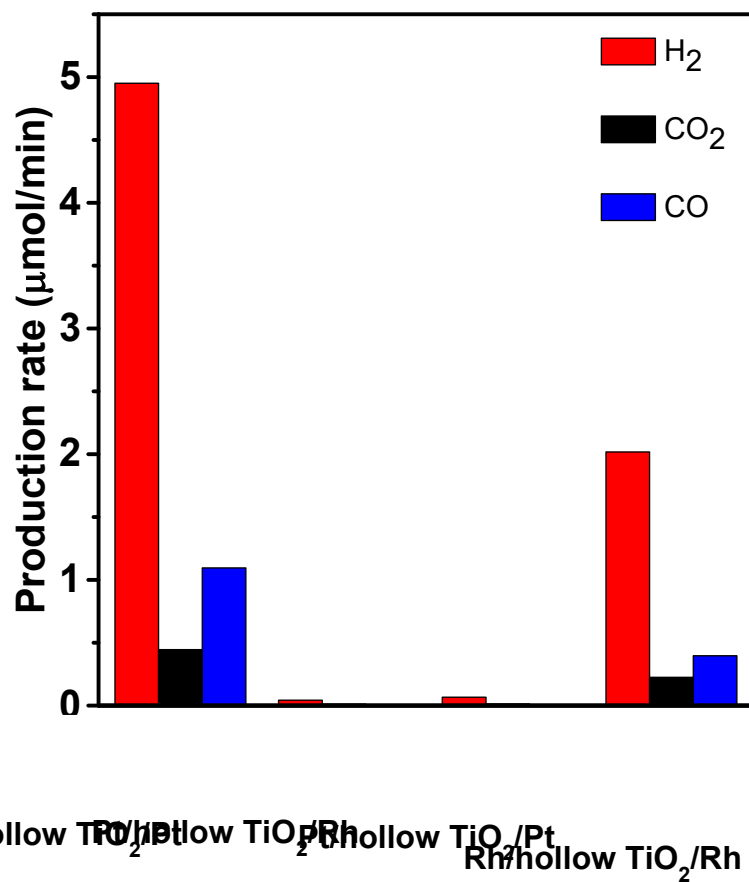

**Figure S6.** Product distribution generated by Pt and Rh-loaded hollow TiO<sub>2</sub> photocatalysts during SRM. The operation temperature was 300 °C.



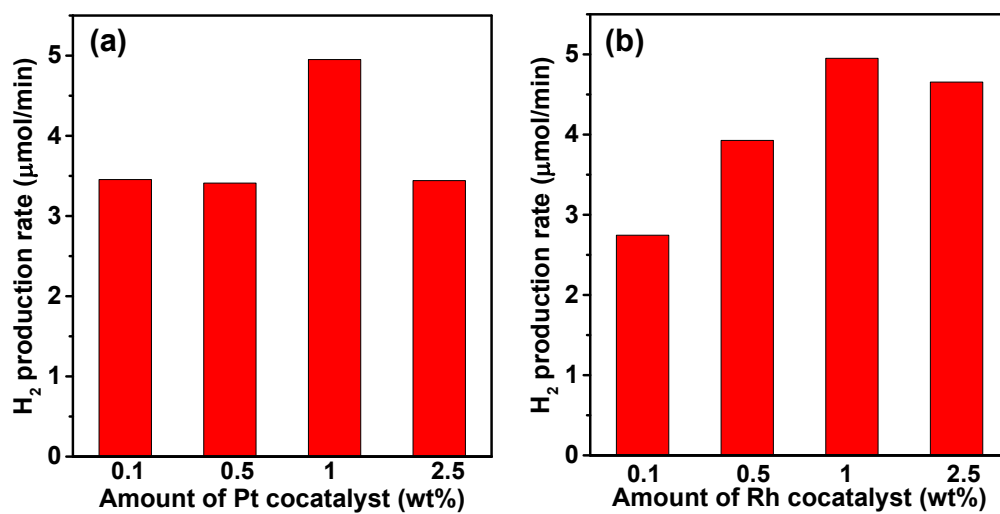

Figure S7.  
Influ

ence of co-catalyst loading amount of photocatalytic SRM activity on Rh/hollow TiO<sub>2</sub>/Pt. (a) The Pt loading amount was varied between 0.1 and 2.5 wt% at a constant Rh amount to 1 wt%. (b) The Rh loading amount was varied between 0.1 and 2.5 wt% at a constant Pt amount to 1 wt%. The operation temperature was 300 °C.

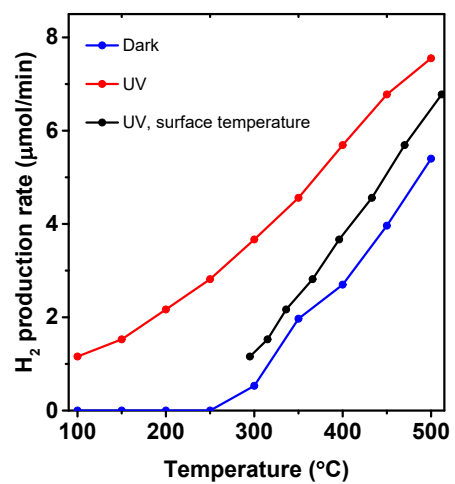

**Figure S8.** Temperature dependence of photocatalytic SRM activity on Rh/hollow TiO<sub>2</sub>/Pt under dark (blue line) and UV irradiation (red line) conditions. The black line represents the H<sub>2</sub> production rate under UV irradiation at the surface temperature, not operation temperature.

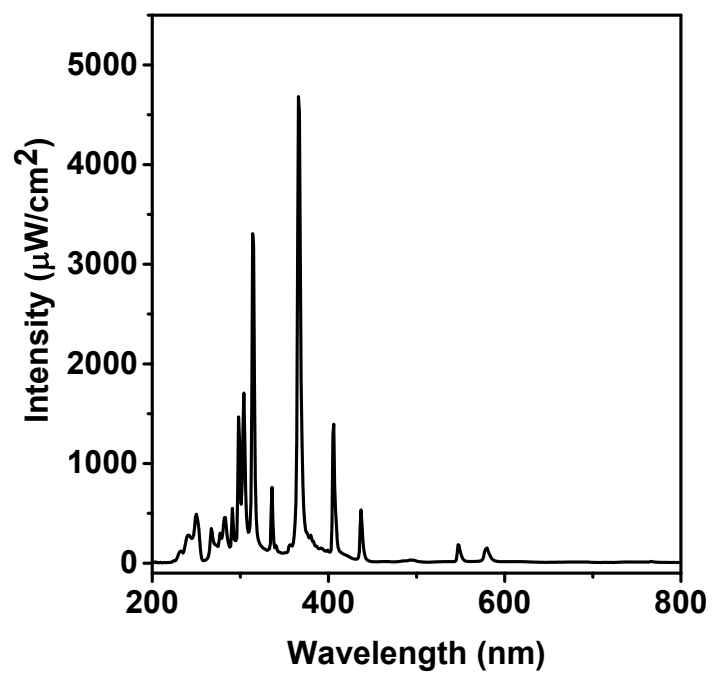

Figure S9. Spectrum of the Hg-Xe lamp used for the SRM test.

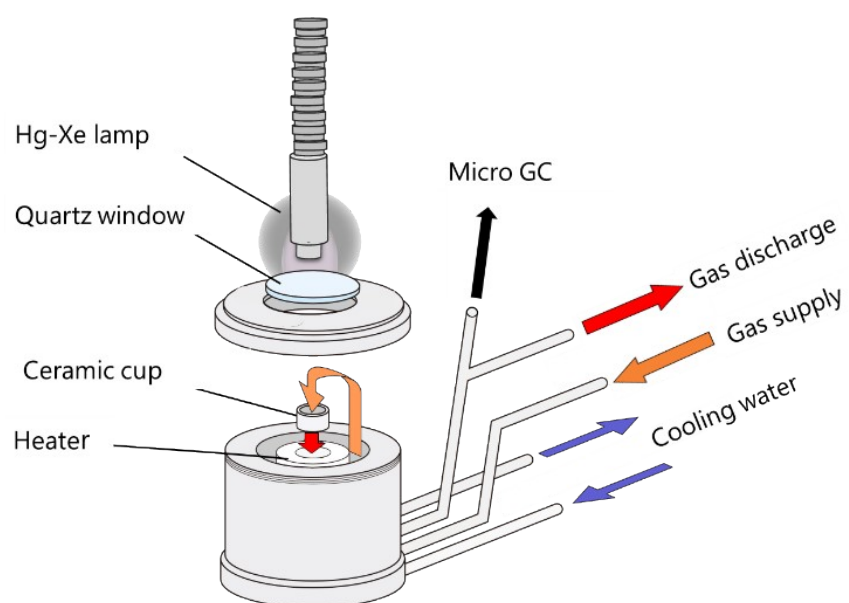

**Figure S10.** Schematic image of the flow-reactor used for SRM test. In this setup, the sample was mounted in the ceramic cup and placed in the reactor equipped with a heater. Reactant gas was introduced to the reactor and reaction product was analyzed with online-connected micro-GC. The UV lamp was irradiated through quartz window at the upper part of the reactor.

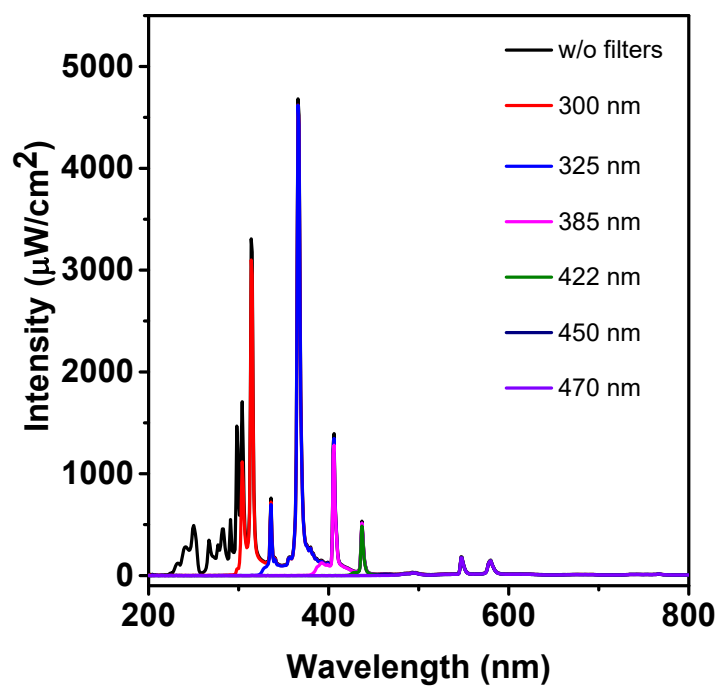

**Figure S11.** Spectrum of the Hg-Xe lamp obtained using long-pass cutoff filters. The cutoff wavelength for each filter is indicated.
